# Supplementary material
Source: publisher figshare collection journal article supplement (https://sage.figshare.com/ndownloader/files/17947742)
Supplement: Supplementary file 1 [file 17947742]

## Supplemental material

### Appendix A: Data sources

District GDP data was released by *the Planning Commission of India* and available at <https://data.gov.in/>.

Rajasthan district GDP (2010-11) data by *Govt. of Rajasthan*: <https://bit.ly/2TD2R2G>.

Tamil Nadu district GDP (2004-11) data from *TN's Dept. of Economics and Statistics* (documents).

Delhi state GDP data by *Govt. of Delhi*, available at <https://bit.ly/2GtVqXN>.

The 2004-05 current price GDP time series for 11 Indian states is available at <https://bit.ly/2Smozbi>.

State-level GDPs for 2010-11, by the *Planning Commission*, available at <https://bit.ly/2GeUM0X>.

Population, Urbanization data from *Census of India* 2011, at <https://bit.ly/2IY2Xp3>
